# Supplementary material
Source: Springer Nature journal article supplement (https://www.springermedizin.de/resource/supplementary/12963_2013_243_MOESM1_ESM.pdf/9572434)
Supplement: MOESM1 [file 9572434]

# Region

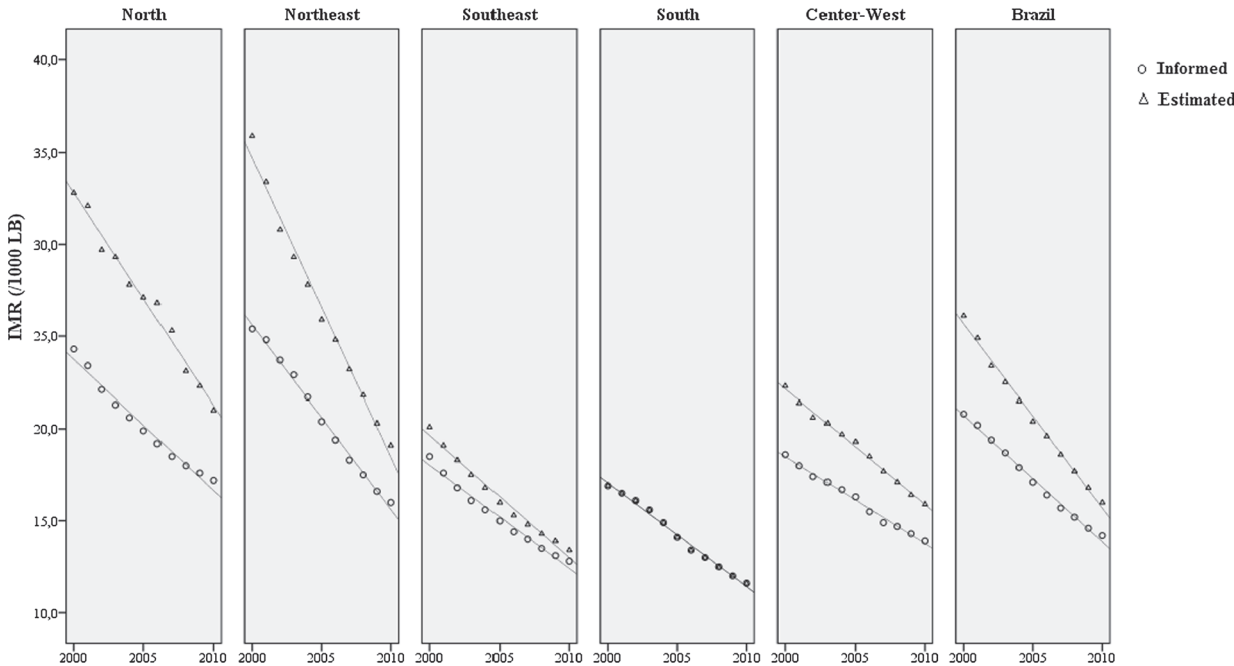

○ Estimated IMR using reported vital data.

△ Estimated IMR calculated using corrected vital data.
